# Supplementary material for: Relating tissue specialization to the differentiation of expression of singleton and duplicate mouse proteins
Source: PubMed Central journal article supplement (PMC1794571; doi:10.1186/gb-2006-7-10-r89), 2006-10-09
Supplement: gb-2006-7-10-r89-S1.pdf [file gb-2006-7-10-r89-S1.pdf]

# Relating tissue specialisation to the differentiation of expression of singleton and duplicate mouse genes

Shiri Freilich, Tim Massingham, Eric Blanc, Leon Goldovsky, Janet M Thornton

## Supplementary data

**Comparison between the main and the additional dataset.** Two sources of microarray data were analysed for the work reported here: expression information collected on Affymetrix U74Av2 GeneChip arrays and expression information collected on Novartis GNF1M GeneChip arrays (see text). Of the 4914 proteins mapped to a probe-set from the U74Av2 GeneChip, and 13045 proteins mapped to a probe-set from the GNF1M Genechip, there are 3935 proteins in common. We studied the expression pattern (Absence/Presence calls) of these proteins in 14 tissues reported by the two datasets. The number of proteins expressed in each tissue from both sources of data and from the overlap set is shown in Supplementary Figure 1. Most proteins that are reported as present by the GNF1M GeneChip are also reported as present by the U74Av2 GeneChip, but not vice versa. These differences between the GeneChips may be explained by the differences in their sensitivity due to differences in their probe-sets. In the U74Av2 GeneChip most probe-sets are composed of 16 individual reporters, while in GNF1M GeneChip most probe-sets are composed of only 11 individual reporters. Those design differences affect the sensitivity of the MAS5 Presence/Absence call.

Based on the analysis performed and the design of the reporter sets, we believe that the U74Av2 arrays are more sensitive when only reporting absence or presence of expression. Therefore, we chose to report the results from this data source in the paper (main dataset). We have repeated all analyses with the GNF1M arrays (additional dataset).

**Testing the dependence between expression breadth and the number of duplicate-pairs in a group of slow-evolving metazoan-specific proteins.** In order to verify that the correlation observed in the metazoan-specific protein subset between expression breadth and number of duplicates is not derived from the enrichment of this group in fast-evolving

proteins we have repeated the analysis with a group of slow-evolving metazoan-specific proteins. A significant negative correlation between expression breadth and number of duplicate-pairs were found both in a group of 248 metazoan-specific proteins where mouse-rat evolutionary rate ( $k_a/k_s$ )  $< 0.05$  (group 1) and in a group of 49 proteins where rate  $< 0.005$  (group 2). Correlation was also detected in the group of the 248 fastest evolving proteins (group 3, evolutionary rate  $> 0.23$ ). The values of evolutionary rates between mouse and rat proteins were obtained as described in the method section in the main text. Correlation for group 1: kendall's tau = -0.28,  $P$  value =  $5.11 \times 10^{-11}$ . Correlation for group 2: kendall's tau = -0.39,  $P$  value =  $3.27 \times 10^{-5}$ . Correlation for group 3: kendall's tau = -0.29,  $P$  value =  $6.7 \times 10^{-12}$ .

## Figure legends

Supp. Figure 1: Number of proteins expressed in a tissue, out of 3935 proteins common to the main and additional dataset.

Supp. Figure 2: Analysis based on the additional database. Expression breadth versus the number of duplicate-pairs. Red dots – singleton proteins, black dots – duplicate proteins. The tissues tested are the 20 cluster-representing tissues. (A) The size of the dots represents the number of proteins that have the same number of duplicate-pairs and the same expression breadth. The blue dots represent the average expression breadth of proteins with the same number of duplicate-pairs. Sample size: 7127 proteins; kendall's tau = -0.02;  $P$  value =  $8.7 \times 10^{-4}$ ; 95% confidence intervals: (-0.04, -0.01). (B) Proteins are ordered according to their number of duplicate-pairs and collected into bins of at least 100 proteins. Each point represents a bin. Error bars indicate the standard deviation from the mean obtained by bootstrapping.

Supp. Figure 3: Analysis based on the additional database. Expression breadth versus the number of duplicate-pairs. Red dots – singleton proteins, black dots – duplicate proteins. The tissues tested are the 20 cluster-representing tissues. (A,C,E) The size of the dots represents the number of proteins that have the same number of duplicate-pairs and the same expression breadth. The blue dots represent the average expression breadth of proteins with the same number of duplicate-pairs. preMD subset (A): 489 proteins, kendall's tau = 0.07,  $P$  value = 0.99, 95% confidence intervals: (-0.01, 0.14); postMD subset (C): 875 proteins, kendall's tau = -0.07,  $P$  value =  $1.5 \times 10^{-3}$ , 95% confidence intervals: (-0.12, -0.02); Metazoan-specific proteins subset (E): 3281 proteins, kendall's tau = -0.11,  $P$  value =  $3.7 \times 10^{-22}$ , 95% confidence intervals: (-0.14, -0.09); (B,D,F) Proteins are ordered according to their number of duplicate-pairs and collected into bins of at least 10 proteins. Each point represents a bin. Error bars indicate the standard deviation from the mean obtained by bootstrapping.

Supp. Figure 4: Analysis based on the additional database. Average cumulative expression coverage in bins of protein families, ordered by size of family. Protein families where

expression information is available for at least a single member (black) are grouped into bins of at least 35 proteins (total number of families: 2054). Protein families where expression information is available for at least 75% of the family members (green) are grouped into bins of at least 10 proteins (total number of families: 761). Each point represents a bin. Values on the X-axis describe the size of a family with any expression information (black dots). The size of families with 75% expression information (green dots) is the value on top of each green dot. The tissues tested are the 20 cluster-representing tissues.

Supplement Figure 1

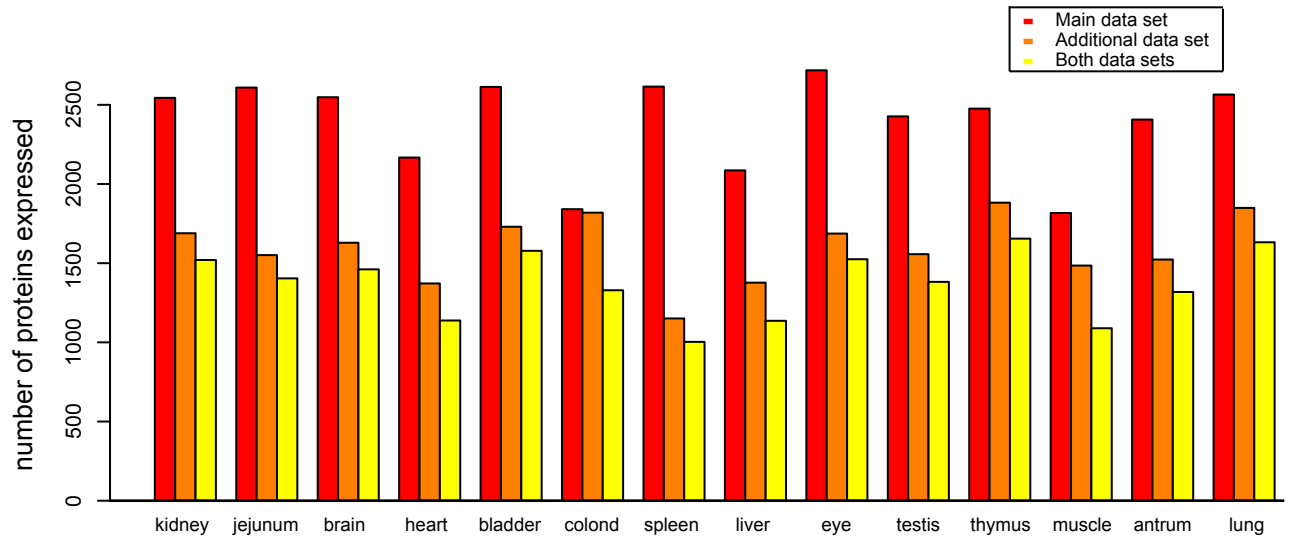

Supplement Figure 2

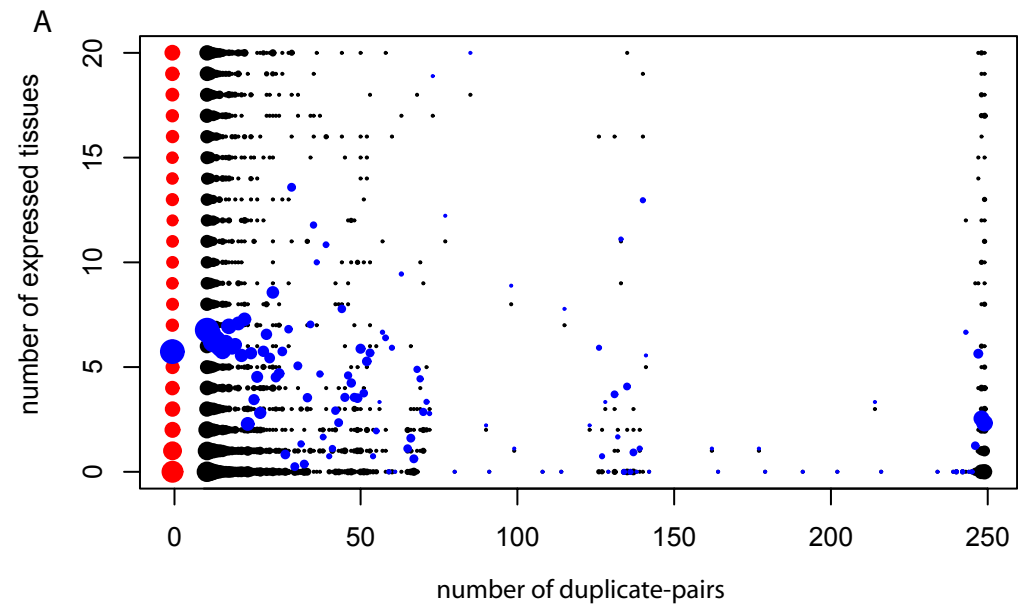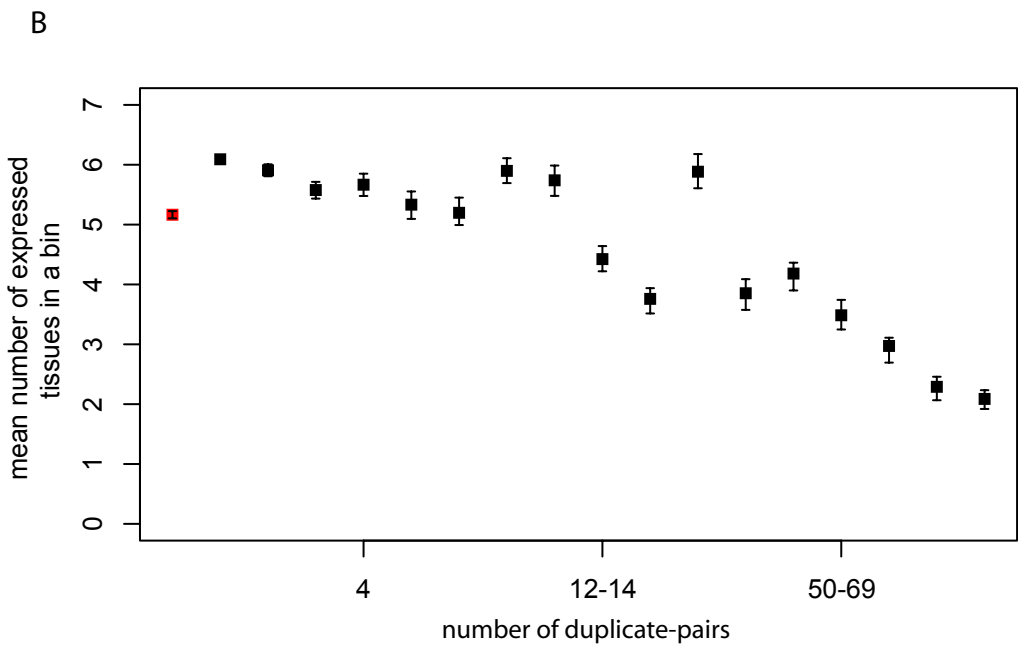

Supplement Figure 3

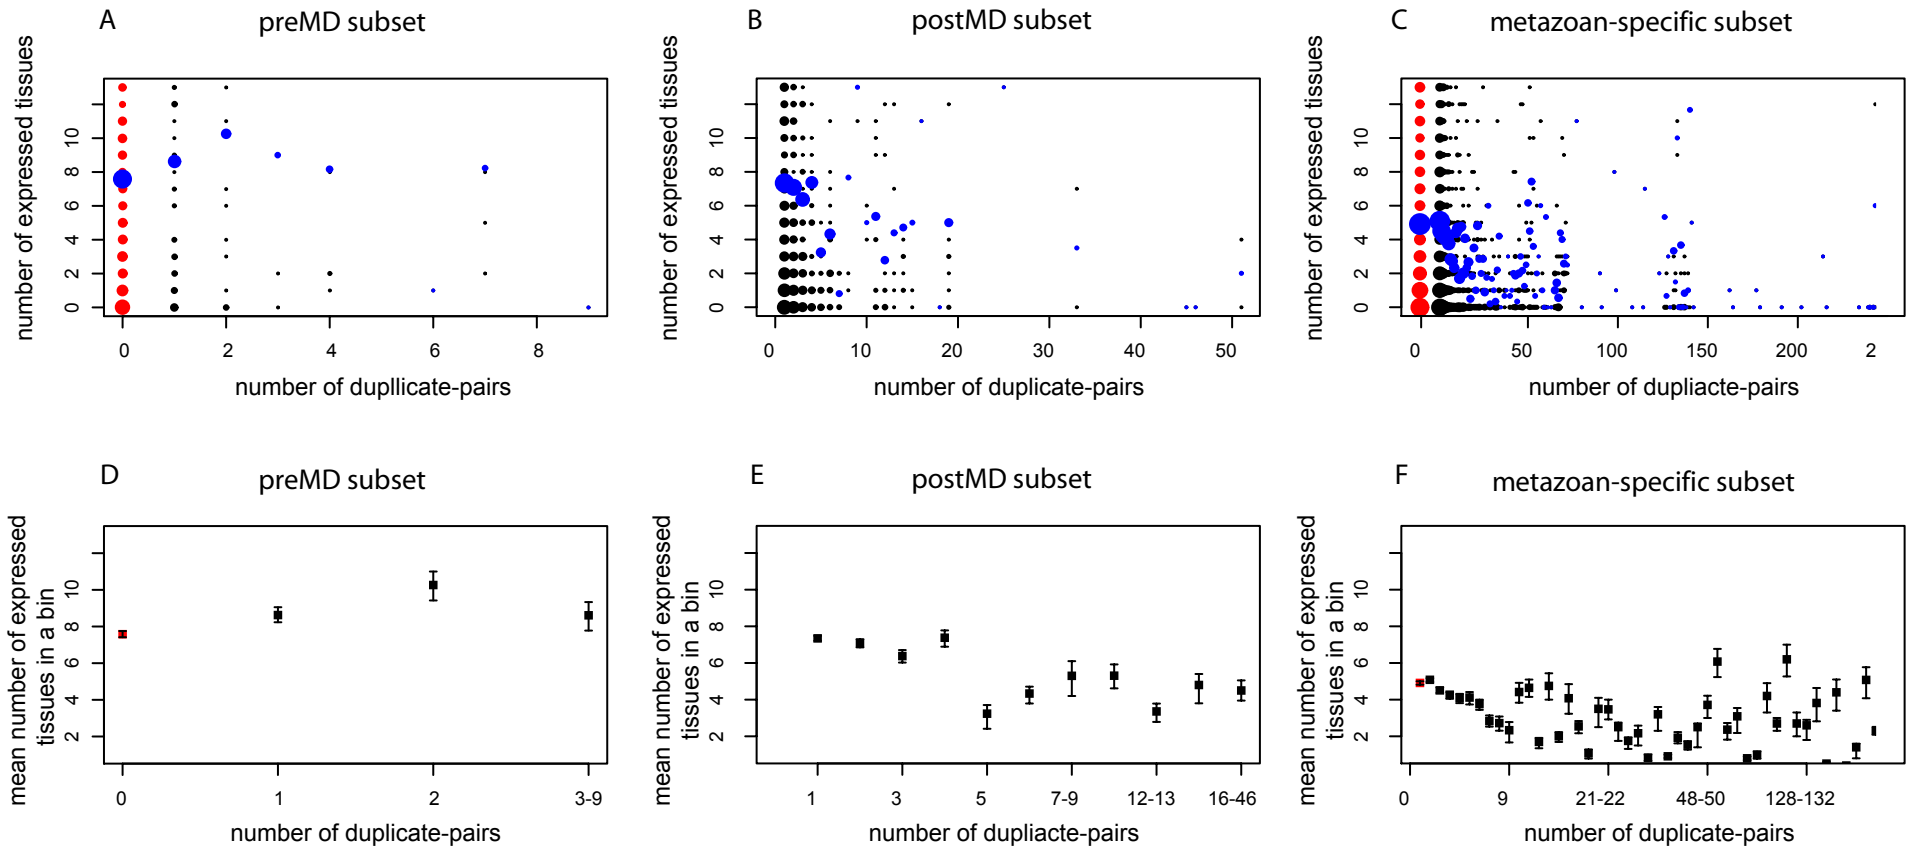

Supplement Figure 4

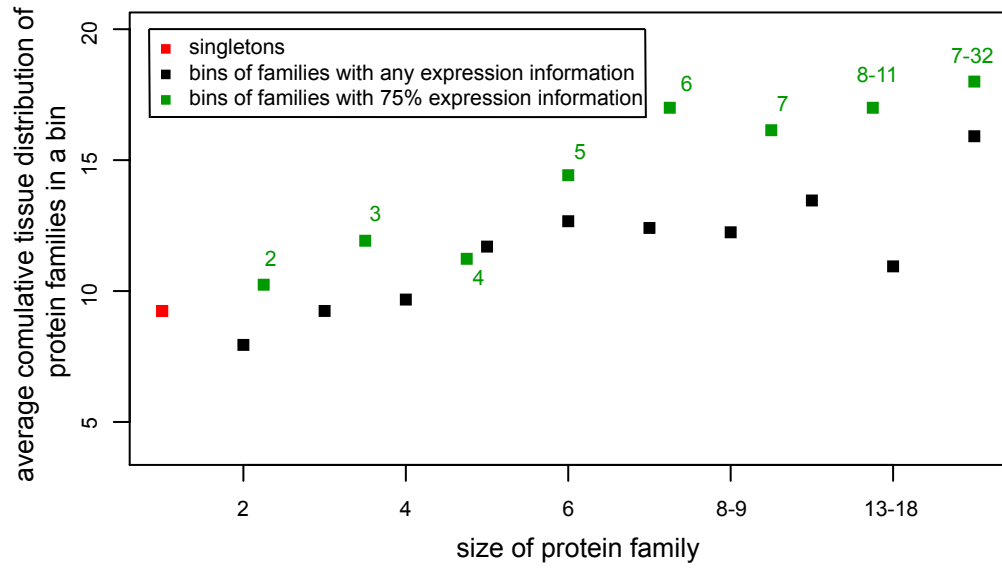



**Supplementary Table 1.** The total number of proteins in the different groups of phyletic age/time of duplication analysed. The numbers in brackets are the numbers of proteins in the group for which expression data was available in the additional dataset.

|                                                                    | Complete dataset | PreMD subset | PostMD subset | Metazoan-specific subset |
|--------------------------------------------------------------------|------------------|--------------|---------------|--------------------------|
| Number of proteins in the mouse proteome                           | 31535 (13045)    | 2231 (1317)  | 3699 (1335)   | 15394 (5908)             |
| Number of proteins that are either singleton or duplicate proteins | 18075 (7127)     | 811 (489)    | 2495 (875)    | 9390 (3281)              |
| Number of singleton proteins                                       | 3691 (2054)      | 667 (396)    | 0 (0)         | 1960 (1041)              |
| Number of duplicate proteins                                       | 14384 (5073)     | 144 (93)     | 2495 (875)    | 7430 (2240)              |

**Supplementary Table 2.** Annotations of specifically expressed singleton proteins (expressed in at most 3 tissues).

|          | ENSEMBL id<br>(phyletic group*) | SWISSPROT<br>accession and<br>name                         | GO Molecular Function                                                                                                                                                                                                                                                                                                                                                                                                                      | GO Biological<br>Process                                    | GO Cellular<br>Component |
|----------|---------------------------------|------------------------------------------------------------|--------------------------------------------------------------------------------------------------------------------------------------------------------------------------------------------------------------------------------------------------------------------------------------------------------------------------------------------------------------------------------------------------------------------------------------------|-------------------------------------------------------------|--------------------------|
| antrum   | ENSMUSP000000<br>23510 (PM)     | PYR5_MOUSE<br>Uridine 5'-<br>monophosphate<br>synthase     | nucleobase, nucleoside,<br>nucleotide and nucleic acid<br>metabolism,'de novo'<br>pyrimidine base<br>biosynthesis,aromatic<br>compound<br>metabolism,biosynthesis,nuc<br>leobase<br>metabolism,heterocycle<br>metabolism,                                                                                                                                                                                                                  | transferase<br>activity,lyase<br>activity,                  |                          |
| antrum   | ENSMUSP000000<br>47720 (PM)     |                                                            |                                                                                                                                                                                                                                                                                                                                                                                                                                            |                                                             |                          |
| appendix | ENSMUSP000000<br>43369 (MS)     | IL5_MOUSE<br>Interleukin-5<br>[Precursor]                  | phosphorus<br>metabolism,phosphate<br>metabolism,immune<br>response,response to biotic<br>stimulus,positive regulation<br>of metabolism,peptidyl-<br>tyrosine<br>phosphorylation,peptidyl-<br>tyrosine<br>modification,regulation of<br>phosphate<br>metabolism,regulation of<br>metabolism,macromolecule<br>metabolism,positive<br>regulation of phosphate<br>metabolism,positive<br>regulation of peptidyl-<br>tyrosine phosphorylation, | receptor binding,                                           |                          |
| bladder  | ENSMUSP000000<br>06692 (PM)     | ER19_MOUSE<br>Diphosphomevalon<br>ate decarboxylase        | alcohol metabolism,lipid<br>metabolism,cholesterol<br>biosynthesis,phosphorus<br>metabolism,phosphate<br>metabolism,biosynthesis,ma<br>cromolecule metabolism,                                                                                                                                                                                                                                                                             | nucleotide<br>binding,kinase<br>activity,lyase<br>activity, |                          |
| bladder  | ENSMUSP000000<br>21130 (MS)     |                                                            |                                                                                                                                                                                                                                                                                                                                                                                                                                            |                                                             |                          |
| bladder  | ENSMUSP000000<br>25773 (PM)     | DPD4_MOUSE<br>DNA polymerase<br>delta subunit 4            | nucleobase, nucleoside,<br>nucleotide and nucleic acid<br>metabolism,cell cycle,cell<br>growth and/or maintenance,                                                                                                                                                                                                                                                                                                                         | transferase<br>activity,                                    | nucleus,                 |
| bladder  | ENSMUSP000000<br>47720 (PM)     |                                                            |                                                                                                                                                                                                                                                                                                                                                                                                                                            |                                                             |                          |
| bladder  | ENSMUSP000000<br>71235 (MS)     | PHX4_MOUSE<br>Putative per-<br>hexamer repeat<br>protein 4 |                                                                                                                                                                                                                                                                                                                                                                                                                                            |                                                             | integral to<br>membrane, |
| brain    | ENSMUSP000000<br>18595 (MS)     |                                                            |                                                                                                                                                                                                                                                                                                                                                                                                                                            |                                                             |                          |
| brain    | ENSMUSP000000<br>26466 (MS)     | TKNK_MOUSE<br>Neurokinin B<br>[Precursor]                  | signal transduction,cell<br>surface receptor linked<br>signal<br>transduction,tachykinin<br>signaling<br>pathway,neuropeptide<br>signaling pathway,cell-cell<br>signaling,transmission of<br>nerve<br>impulse,neurophysiological<br>process,organismal<br>movement,neuromuscular                                                                                                                                                           | receptor binding,                                           |                          |

|       |                             |                                                         |                                                                                                                                                                                                                                                                                                                                                                                                                     |                                                    |                       |
|-------|-----------------------------|---------------------------------------------------------|---------------------------------------------------------------------------------------------------------------------------------------------------------------------------------------------------------------------------------------------------------------------------------------------------------------------------------------------------------------------------------------------------------------------|----------------------------------------------------|-----------------------|
|       |                             |                                                         | physiological process,                                                                                                                                                                                                                                                                                                                                                                                              |                                                    |                       |
| brain | ENSMUSP000000<br>31268 (PM) |                                                         |                                                                                                                                                                                                                                                                                                                                                                                                                     | hydrolase activity,                                |                       |
| brain | ENSMUSP000000<br>33198 (PM) | CRYM_MOUSE<br>Mu-crystallin homolog                     | morphogenesis,organogenesis,                                                                                                                                                                                                                                                                                                                                                                                        | structural constituent of eye lens,                | cytoplasm,            |
| brain | ENSMUSP000000<br>34023 (MS) | SRG1_MOUSE<br>Scrapie-responsive protein 1 [Precursor]  |                                                                                                                                                                                                                                                                                                                                                                                                                     |                                                    |                       |
| brain | ENSMUSP000000<br>39418 (MS) | VHL_MOUSE<br>Von Hippel-Lindau disease tumor suppressor | cell cycle,cell growth and/or maintenance,protein ubiquitination,macromolecule metabolism,                                                                                                                                                                                                                                                                                                                          | protein binding,                                   | nucleus,              |
| brain | ENSMUSP000000<br>40342 (MS) |                                                         | peptide hormone processing,hormone metabolism,macromolecule metabolism,                                                                                                                                                                                                                                                                                                                                             | enzyme inhibitor activity,                         | cytoplasm,            |
| brain | ENSMUSP000000<br>46012 (MS) | APEL_MOUSE<br>Apelin [Precursor]                        | signal transduction,cell surface receptor linked signal transduction,                                                                                                                                                                                                                                                                                                                                               | receptor binding,                                  |                       |
| brain | ENSMUSP000000<br>65423 (PM) |                                                         |                                                                                                                                                                                                                                                                                                                                                                                                                     | carbohydrate binding,                              |                       |
| brain | ENSMUSP000000<br>67770 (MS) |                                                         |                                                                                                                                                                                                                                                                                                                                                                                                                     |                                                    |                       |
| brain | ENSMUSP000000<br>75395 (PM) |                                                         | nucleobase, nucleoside, nucleotide and nucleic acid metabolism,regulation of transcription, DNA-dependent,regulation of transcription from Pol II promoter,transcription from Pol II promoter,positive regulation of metabolism,regulation of nucleobase,regulation of metabolism,positive regulation of transcription,positive regulation of nucleobase,positive regulation of transcription from Pol II promoter, | transcription cofactor activity,protein binding,   | nucleus,              |
| cecum | ENSMUSP000000<br>06692 (PM) | ER19_MOUSE<br>Diphosphomevalonate decarboxylase         | alcohol metabolism,lipid metabolism,cholesterol biosynthesis,phosphorus metabolism,phosphate metabolism,biosynthesis,macromolecule metabolism,                                                                                                                                                                                                                                                                      | nucleotide binding,kinase activity,lyase activity, |                       |
| cecum | ENSMUSP000000<br>25773 (PM) | DPD4_MOUSE<br>DNA polymerase delta subunit 4            | nucleobase, nucleoside, nucleotide and nucleic acid metabolism,cell cycle,cell growth and/or maintenance,                                                                                                                                                                                                                                                                                                           | transferase activity,                              | nucleus,              |
| cecum | ENSMUSP000000<br>31146 (MS) | NEUU_MOUSE<br>Neuromedin U-23 [Precursor]               | cell motility,signal transduction,cell surface receptor linked signal transduction,neuropeptide signaling pathway,                                                                                                                                                                                                                                                                                                  |                                                    |                       |
| cecum | ENSMUSP000000<br>31268 (PM) |                                                         |                                                                                                                                                                                                                                                                                                                                                                                                                     | hydrolase activity,                                |                       |
| cecum | ENSMUSP000000<br>45737 (PM) | CND2_MOUSE<br>Condensin complex subunit 2               | M phase of mitotic cell cycle,nuclear division,cytokinesis,cell cycle,cell growth and/or maintenance,                                                                                                                                                                                                                                                                                                               |                                                    | nucleus,              |
| cecum | ENSMUSP000000<br>71235 (MS) | PHX4_MOUSE<br>Putative perhexamer repeat protein 4      |                                                                                                                                                                                                                                                                                                                                                                                                                     |                                                    | integral to membrane, |

|                |                             |                                                               |                                                                                                                                                                                                                                                                                                            |                                           |                                                                 |
|----------------|-----------------------------|---------------------------------------------------------------|------------------------------------------------------------------------------------------------------------------------------------------------------------------------------------------------------------------------------------------------------------------------------------------------------------|-------------------------------------------|-----------------------------------------------------------------|
| cecum          | ENSMUSP000000<br>71936 (PM) | YV03_MOUSE<br>Hypothetical<br>protein PP2447<br>homolog       |                                                                                                                                                                                                                                                                                                            |                                           |                                                                 |
| distal colon   | ENSMUSP000000<br>31146 (MS) | NEUU_MOUSE<br>Neuromedin U-23<br>[Precursor]                  | cell motility,signal<br>transduction,cell surface<br>receptor linked signal<br>transduction,neuropeptide<br>signaling pathway,                                                                                                                                                                             |                                           |                                                                 |
| proximal colon | ENSMUSP000000<br>31146 (MS) | NEUU_MOUSE<br>Neuromedin U-23<br>[Precursor]                  | cell motility,signal<br>transduction,cell surface<br>receptor linked signal<br>transduction,neuropeptide<br>signaling pathway,                                                                                                                                                                             |                                           |                                                                 |
| duodenum       | ENSMUSP000000<br>25704 (MS) |                                                               | cytokinesis,cell growth<br>and/or maintenance,                                                                                                                                                                                                                                                             |                                           |                                                                 |
| duodenum       | ENSMUSP000000<br>31268 (PM) |                                                               |                                                                                                                                                                                                                                                                                                            | hydrolase<br>activity,                    |                                                                 |
| duodenum       | ENSMUSP000000<br>39418 (MS) | VHL_MOUSE<br>Von Hippel-Lindau<br>disease tumor<br>suppressor | cell cycle,cell growth and/or<br>maintenance,protein<br>ubiquitination,macromolecul<br>e metabolism,                                                                                                                                                                                                       | protein binding,                          | nucleus,                                                        |
| duodenum       | ENSMUSP000000<br>45737 (PM) | CND2_MOUSE<br>Condensin<br>complex subunit 2                  | M phase of mitotic cell<br>cycle,nuclear<br>division,cytokinesis,cell<br>cycle,cell growth and/or<br>maintenance,                                                                                                                                                                                          |                                           | nucleus,                                                        |
| duodenum       | ENSMUSP000000<br>46012 (MS) | APEL_MOUSE<br>Apelin [Precursor]                              | signal transduction,cell<br>surface receptor linked<br>signal transduction,                                                                                                                                                                                                                                | receptor binding,                         |                                                                 |
| duodenum       | ENSMUSP000000<br>56752-D    |                                                               |                                                                                                                                                                                                                                                                                                            |                                           |                                                                 |
| eye            | ENSMUSP000000<br>18595 (MS) |                                                               |                                                                                                                                                                                                                                                                                                            |                                           |                                                                 |
| eye            | ENSMUSP000000<br>26466 (MS) | TKNK_MOUSE<br>Neurokinin B<br>[Precursor]                     | signal transduction,cell<br>surface receptor linked<br>signal<br>transduction,tachykinin<br>signaling<br>pathway,neuropeptide<br>signaling pathway,cell-cell<br>signaling,transmission of<br>nerve<br>impulse,neurophysiological<br>process,organismal<br>movement,neuromuscular<br>physiological process, | receptor binding,                         |                                                                 |
| eye            | ENSMUSP000000<br>31268 (PM) |                                                               |                                                                                                                                                                                                                                                                                                            | hydrolase<br>activity,                    |                                                                 |
| eye            | ENSMUSP000000<br>33198 (PM) | CRYM_MOUSE<br>Mu-crystallin<br>homolog                        | morphogenesis,organogenes<br>is,                                                                                                                                                                                                                                                                           | structural<br>constituent of<br>eye lens, | cytoplasm,                                                      |
| eye            | ENSMUSP000000<br>36541 (PM) |                                                               |                                                                                                                                                                                                                                                                                                            |                                           |                                                                 |
| eye            | ENSMUSP000000<br>40342 (MS) |                                                               | peptide hormone<br>processing,hormone<br>metabolism,macromolecul<br>e metabolism,                                                                                                                                                                                                                          | enzyme inhibitor<br>activity,             | cytoplasm,                                                      |
| eye            | ENSMUSP000000<br>63590 (PM) | N107_MOUSE<br>Nuclear pore<br>complex protein<br>Nup107       | cell growth and/or<br>maintenance,                                                                                                                                                                                                                                                                         |                                           | nucleus,end<br>omembrane<br>system,inte<br>gral to<br>membrane, |
| eye            | ENSMUSP000000<br>65836 (PM) |                                                               |                                                                                                                                                                                                                                                                                                            |                                           |                                                                 |
| eye            | ENSMUSP000000<br>67770 (MS) |                                                               |                                                                                                                                                                                                                                                                                                            |                                           |                                                                 |
| gall bladder   | ENSMUSP000000<br>16031 (PM) | HUTH_MOUSE<br>Histidine                                       | organic acid<br>metabolism,amino acid and                                                                                                                                                                                                                                                                  | lyase<br>activity,ligase                  | cytoplasm,                                                      |

|              |                         |                                                      |                                                                                                                                                                                                                                           |                             |                                                                             |
|--------------|-------------------------|------------------------------------------------------|-------------------------------------------------------------------------------------------------------------------------------------------------------------------------------------------------------------------------------------------|-----------------------------|-----------------------------------------------------------------------------|
|              |                         | ammonia-lyase                                        | derivative metabolism,amino acid metabolism,histidine metabolism,catabolism,biosynthesis,histidine family amino acid catabolism,amine metabolism,amine catabolism,                                                                        | activity,                   |                                                                             |
| gall bladder | ENSMUSP00000022722 (PM) | IRG1_MOUSE<br>Immune-responsive protein 1 [Fragment] |                                                                                                                                                                                                                                           |                             |                                                                             |
| gall bladder | ENSMUSP00000023519 (PM) | HGD_MOUSE<br>Homogentisate 1,2-dioxygenase           | organic acid metabolism,amino acid and derivative metabolism,amino acid metabolism,aromatic compound metabolism,catabolism,aromatic amino acid family catabolism,amine metabolism,amine catabolism,aromatic compound catabolism,          | oxidoreductase activity,    |                                                                             |
| gall bladder | ENSMUSP00000023832 (PM) | SM30_MOUSE<br>Regucalcin                             |                                                                                                                                                                                                                                           | ion binding,                | nucleus,cytoplasm,                                                          |
| gall bladder | ENSMUSP00000025249 (MS) | APOM_MOUSE<br>Apolipoprotein M                       | cell growth and/or maintenance,                                                                                                                                                                                                           | lipid transporter activity, |                                                                             |
| gall bladder | ENSMUSP00000025773 (PM) | DPD4_MOUSE<br>DNA polymerase delta subunit 4         | nucleobase, nucleoside, nucleotide and nucleic acid metabolism,cell cycle,cell growth and/or maintenance,                                                                                                                                 | transferase activity,       | nucleus,                                                                    |
| gall bladder | ENSMUSP00000029645 (PM) | T23O_MOUSE<br>Tryptophan 2,3-dioxygenase             | organic acid metabolism,amino acid and derivative metabolism,amino acid metabolism,tryptophan metabolism,biogenic amine metabolism,aromatic compound metabolism,amine metabolism,indole and derivative metabolism,heterocycle metabolism, | oxidoreductase activity,    |                                                                             |
| gall bladder | ENSMUSP00000032141 (PM) |                                                      |                                                                                                                                                                                                                                           |                             |                                                                             |
| gall bladder | ENSMUSP00000034539 (PM) |                                                      | nucleobase, nucleoside, nucleotide and nucleic acid metabolism,catabolism,macromolecule catabolism,macromolecule metabolism,                                                                                                              | hydrolase activity,         | nucleus,                                                                    |
| gall bladder | ENSMUSP00000047720 (PM) |                                                      |                                                                                                                                                                                                                                           |                             |                                                                             |
| gall bladder | ENSMUSP00000071235 (MS) | PHX4_MOUSE<br>Putative per-hexamer repeat protein 4  |                                                                                                                                                                                                                                           |                             | integral to membrane,                                                       |
| gall bladder | ENSMUSP00000077192 (PM) |                                                      | lipid metabolism,phospholipid metabolism,phosphatidylcholine biosynthesis,phospholipid biosynthesis,biosynthesis,macromolecule metabolism,membrane lipid biosynthesis,phosphatidylch                                                      | transferase activity,       | cytoplasm, mitochondrial membrane,endomembrane system,integral to membrane, |

|         |                         |                                                   |                                                                                                                                                      |                                                      |                            |
|---------|-------------------------|---------------------------------------------------|------------------------------------------------------------------------------------------------------------------------------------------------------|------------------------------------------------------|----------------------------|
|         |                         |                                                   | oline metabolism, glycerophospholipid biosynthesis,                                                                                                  |                                                      |                            |
| heart   | ENSMUSP00000025554 (MS) | UTER_MOUSE<br>Uteroglobin<br>[Precursor]          |                                                                                                                                                      | enzyme inhibitor activity, steroid binding,          |                            |
| ileum   | ENSMUSP00000001667 (MS) | CASK_MOUSE<br>Kappa-casein<br>[Precursor]         |                                                                                                                                                      |                                                      |                            |
| ileum   | ENSMUSP00000006692 (PM) | ER19_MOUSE<br>Kappa-casein<br>[Precursor]         | alcohol metabolism, lipid metabolism, cholesterol biosynthesis, phosphorus metabolism, phosphate metabolism, biosynthesis, macromolecule metabolism, | nucleotide binding, kinase activity, lyase activity, |                            |
| ileum   | ENSMUSP00000025704 (MS) |                                                   | cytokinesis, cell growth and/or maintenance,                                                                                                         |                                                      |                            |
| ileum   | ENSMUSP00000025773 (PM) | DPD4_MOUSE<br>DNA polymerase delta subunit 4      | nucleobase, nucleoside, nucleotide and nucleic acid metabolism, cell cycle, cell growth and/or maintenance,                                          | transferase activity,                                | nucleus,                   |
| ileum   | ENSMUSP00000031268 (PM) |                                                   |                                                                                                                                                      | hydrolase activity,                                  |                            |
| ileum   | ENSMUSP00000034359 (MS) |                                                   |                                                                                                                                                      |                                                      |                            |
| ileum   | ENSMUSP00000034539 (PM) |                                                   | nucleobase, nucleoside, nucleotide and nucleic acid metabolism, catabolism, macromolecule catabolism, macromolecule metabolism,                      | hydrolase activity,                                  | nucleus,                   |
| ileum   | ENSMUSP00000037484 (MS) |                                                   |                                                                                                                                                      | ion binding,                                         |                            |
| ileum   | ENSMUSP00000045737 (PM) | CND2_MOUSE<br>Condensin complex subunit 2         | M phase of mitotic cell cycle, nuclear division, cytokinesis, cell cycle, cell growth and/or maintenance,                                            |                                                      | nucleus,                   |
| ileum   | ENSMUSP00000046012 (MS) | APEL_MOUSE<br>Apelin [Precursor]                  | signal transduction, cell surface receptor linked signal transduction,                                                                               | receptor binding,                                    |                            |
| ileum   | ENSMUSP00000071936 (PM) | YV03_MOUSE<br>Hypothetical protein PP2447 homolog |                                                                                                                                                      |                                                      |                            |
| jejunum | ENSMUSP00000025704 (MS) |                                                   | cytokinesis, cell growth and/or maintenance,                                                                                                         |                                                      |                            |
| jejunum | ENSMUSP00000031268 (PM) |                                                   |                                                                                                                                                      | hydrolase activity,                                  |                            |
| jejunum | ENSMUSP00000034359 (MS) |                                                   |                                                                                                                                                      |                                                      |                            |
| jejunum | ENSMUSP00000045737 (PM) | CND2_MOUSE<br>Condensin complex subunit 2         | M phase of mitotic cell cycle, nuclear division, cytokinesis, cell cycle, cell growth and/or maintenance,                                            |                                                      | nucleus,                   |
| jejunum | ENSMUSP00000046012 (MS) | APEL_MOUSE<br>Apelin [Precursor]                  | signal transduction, cell surface receptor linked signal transduction,                                                                               | receptor binding,                                    |                            |
| kidney  | ENSMUSP00000006692 (PM) | ER19_MOUSE<br>Kappa-casein<br>[Precursor]         | alcohol metabolism, lipid metabolism, cholesterol biosynthesis, phosphorus metabolism, phosphate metabolism, biosynthesis, macromolecule metabolism, | nucleotide binding, kinase activity, lyase activity, |                            |
| kidney  | ENSMUSP00000023282 (PM) | MIOX_MOUSE<br>Inositol oxygenase                  | monosaccharide metabolism, alcohol metabolism, regulation of cell volume, signal                                                                     | oxidoreductase activity,                             | cytoplasm, inclusion body, |

|        |                         |                                            |                                                                                                                                                                                                                                                                                                                                                                                                                     |                                                  |            |
|--------|-------------------------|--------------------------------------------|---------------------------------------------------------------------------------------------------------------------------------------------------------------------------------------------------------------------------------------------------------------------------------------------------------------------------------------------------------------------------------------------------------------------|--------------------------------------------------|------------|
|        |                         |                                            | transduction,intracellular signaling cascade,cell growth and/or maintenance,catabolism,cellular osmoregulation,membrane organization and biogenesis,carbohydrate catabolism,osmoregulation, myo-inositol catabolism,hexose catabolism,cell homeostasis,macromolecule metabolism,alcohol catabolism,monosaccharide phosphate (MS)ediated signaling,                                                                  |                                                  |            |
| kidney | ENSMUSP00000023519 (PM) | HGD_MOUSE<br>Homogentisate 1,2-dioxygenase | organic acid metabolism,amino acid and derivative metabolism,amino acid metabolism,aromatic compound metabolism,catabolism,aromatic amino acid family catabolism,amine metabolism,amine catabolism,aromatic compound catabolism,                                                                                                                                                                                    | oxidoreductase activity,                         |            |
| kidney | ENSMUSP00000025249 (MS) | APOM_MOUSE<br>Apolipoprotein M             | cell growth and/or maintenance,                                                                                                                                                                                                                                                                                                                                                                                     | lipid transporter activity,                      |            |
| kidney | ENSMUSP00000075395 (PM) |                                            | nucleobase, nucleoside, nucleotide and nucleic acid metabolism,regulation of transcription, DNA-dependent,regulation of transcription from Pol II promoter,transcription from Pol II promoter,positive regulation of metabolism,regulation of nucleobase,regulation of metabolism,positive regulation of transcription,positive regulation of nucleobase,positive regulation of transcription from Pol II promoter, | transcription cofactor activity,protein binding, | nucleus,   |
| liver  | ENSMUSP00000016031 (PM) | HUTH_MOUSE<br>Histidine ammonia-lyase      | organic acid metabolism,amino acid and derivative metabolism,amino acid metabolism,histidine metabolism,catabolism,biosynthesis,histidine family amino acid catabolism,amine metabolism,amine catabolism,                                                                                                                                                                                                           | lyase activity,ligase activity,                  | cytoplasm, |
| liver  | ENSMUSP00000023519 (PM) | HGD_MOUSE<br>Homogentisate 1,2-dioxygenase | organic acid metabolism,amino acid and derivative metabolism,amino acid metabolism,aromatic compound metabolism,catabolism,aromatic amino acid family catabolism,amine                                                                                                                                                                                                                                              | oxidoreductase activity,                         |            |

|        |                         |                                                               |                                                                                                                                                                                                                                           |                                                      |                                                                            |
|--------|-------------------------|---------------------------------------------------------------|-------------------------------------------------------------------------------------------------------------------------------------------------------------------------------------------------------------------------------------------|------------------------------------------------------|----------------------------------------------------------------------------|
|        |                         |                                                               | metabolism,amine catabolism,aromatic compound catabolism,                                                                                                                                                                                 |                                                      |                                                                            |
| liver  | ENSMUSP00000023832 (PM) | SM30_MOUSE<br>Regucalcin                                      |                                                                                                                                                                                                                                           | ion binding,                                         | nucleus,cytoplasm,                                                         |
| liver  | ENSMUSP00000025249 (MS) | APOM_MOUSE<br>Apolipoprotein M                                | cell growth and/or maintenance,                                                                                                                                                                                                           | lipid transporter activity,                          |                                                                            |
| liver  | ENSMUSP00000029645 (PM) | T23O_MOUSE<br>Tryptophan 2,3-dioxygenase                      | organic acid metabolism,amino acid and derivative metabolism,amino acid metabolism,tryptophan metabolism,biogenic amine metabolism,aromatic compound metabolism,amine metabolism,indole and derivative metabolism,heterocycle metabolism, | oxidoreductase activity,                             |                                                                            |
| liver  | ENSMUSP00000060495 (MS) | LCT2_MOUSE<br>Leukocyte cell-derived chemotaxin 2 [Precursor] | sensory perception,response to external stimulus,neurophysiological process,                                                                                                                                                              |                                                      |                                                                            |
| liver  | ENSMUSP00000077192 (PM) |                                                               | lipid metabolism,phospholipid metabolism,phosphatidylcholine biosynthesis,phospholipid biosynthesis,biosynthesis,macromolecule metabolism,membrane lipid biosynthesis,phosphatidylcholine metabolism,glycerophospholipid biosynthesis,    | transferase activity,                                | cytoplasm,mitochondrial membrane,endomembrane system,integral to membrane, |
| lung   | ENSMUSP00000025554 (MS) | UTER_MOUSE<br>Uteroglobin [Precursor]                         |                                                                                                                                                                                                                                           | enzyme inhibitor activity,steroid binding,           |                                                                            |
| lung   | ENSMUSP00000044493 (MS) |                                                               |                                                                                                                                                                                                                                           |                                                      |                                                                            |
| lung   | ENSMUSP00000044862-D    |                                                               |                                                                                                                                                                                                                                           |                                                      |                                                                            |
| lung   | ENSMUSP00000071235 (MS) | PHX4_MOUSE<br>Putative perhexamer repeat protein 4            |                                                                                                                                                                                                                                           |                                                      | integral to membrane,                                                      |
| muscle | ENSMUSP00000030705 (PM) | RFA2_MOUSE<br>Replication protein A 32 kDa subunit            | nucleobase, nucleoside, nucleotide and nucleic acid metabolism,cell cycle,cell growth and/or maintenance,                                                                                                                                 | nucleic acid binding,                                | nucleus,                                                                   |
| muscle | ENSMUSP00000065423 (PM) |                                                               |                                                                                                                                                                                                                                           | carbohydrate binding,                                |                                                                            |
| spleen | ENSMUSP00000025773 (PM) | DPD4_MOUSE<br>DNA polymerase delta subunit 4                  | nucleobase, nucleoside, nucleotide and nucleic acid metabolism,cell cycle,cell growth and/or maintenance,                                                                                                                                 | transferase activity,                                | nucleus,                                                                   |
| spleen | ENSMUSP00000027162 (MS) |                                                               | response to biotic stimulus,                                                                                                                                                                                                              | antigen binding,receptor binding,peptide binding,    | plasma membrane,integral to membrane,                                      |
| spleen | ENSMUSP00000030180 (MS) |                                                               | cell activation,immune response,signal transduction,response to biotic stimulus,T-cell activation,immune cell activation,lymphocyte activation,regulation of T-                                                                           | receptor signaling protein activity,protein binding, | plasma membrane,integral to membrane,                                      |



|        |                          |                                                         |                                                                                                                              |                                                                 |                                                   |
|--------|--------------------------|---------------------------------------------------------|------------------------------------------------------------------------------------------------------------------------------|-----------------------------------------------------------------|---------------------------------------------------|
|        |                          |                                                         | cell activation,regulation of cell activation,                                                                               |                                                                 |                                                   |
| spleen | ENSMUSP00000030705 (PM)  | RFA2_MOUSE<br>Replication protein A 32 kDa subunit      | nucleobase, nucleoside, nucleotide and nucleic acid metabolism,cell cycle,cell growth and/or maintenance,                    | nucleic acid binding,                                           | nucleus,                                          |
| spleen | ENSMUSP00000032141 (PM)  |                                                         |                                                                                                                              |                                                                 |                                                   |
| spleen | ENSMUSP00000034539 (PM)  |                                                         | nucleobase, nucleoside, nucleotide and nucleic acid metabolism,catabolism,macromolecule catabolism,macromolecule metabolism, | hydrolase activity,                                             | nucleus,                                          |
| spleen | ENSMUSP00000044493 (MS)  |                                                         |                                                                                                                              |                                                                 |                                                   |
| spleen | ENSMUSP00000047720 (PM)  |                                                         |                                                                                                                              |                                                                 |                                                   |
| spleen | ENSMUSP00000063590 (PM)  | N107_MOUSE<br>Nuclear pore complex protein Nup107       | cell growth and/or maintenance,                                                                                              |                                                                 | nucleus,endomembrane system,integral to membrane, |
| spleen | ENSMUSP00000071235 (MS)  | PHX4_MOUSE<br>Putative perhexamer repeat protein 4      |                                                                                                                              |                                                                 | integral to membrane,                             |
| spleen | ENSMUSP00000078413-D     | FBS1_MOUSE<br>Fibrosin-1 [Fragment]                     |                                                                                                                              | receptor binding,                                               |                                                   |
| testis | ENSMUSP00000020990 (MS)  | COLI_MOUSE<br>Corticotropin-lipotropin [Precursor]      | signal transduction,cell surface receptor linked signal transduction,neuropeptide signaling pathway,                         | receptor binding,                                               |                                                   |
| testis | ENSMUSP00000022019 (MS)  | IL9_MOUSE<br>Interleukin-9 [Precursor]                  | immune response,response to biotic stimulus,                                                                                 | receptor binding,                                               |                                                   |
| testis | ENSMUSP00000025704 (MS)  |                                                         | cytokinesis,cell growth and/or maintenance,                                                                                  |                                                                 |                                                   |
| testis | ENSMUSP00000031268 (PM)  |                                                         |                                                                                                                              | hydrolase activity,                                             |                                                   |
| testis | ENSMUSP00000031876 (MS)  |                                                         |                                                                                                                              |                                                                 |                                                   |
| testis | ENSMUSP00000032481 (MS)  |                                                         | reproduction,gametogenesis, spermatid development,sexual reproduction,cell differentiation,                                  | nucleic acid binding,protein binding,enzyme activator activity, | nucleus,cytoplasm,                                |
| testis | ENSMUSP00000033691 (MS)  | TSX_MOUSE<br>Testis-specific protein TSX                |                                                                                                                              |                                                                 |                                                   |
| testis | ENSMUSP00000037484 (MS)  |                                                         |                                                                                                                              | ion binding,                                                    |                                                   |
| testis | ENSMUSP00000039418 (MS)  | VHL_MOUSE<br>Von Hippel-Lindau disease tumor suppressor | cell cycle,cell growth and/or maintenance,protein ubiquitination,macromolecule metabolism,                                   | protein binding,                                                | nucleus,                                          |
| testis | ENSMUSP00000044862-D     |                                                         |                                                                                                                              |                                                                 |                                                   |
| testis | ENSMUSP00000045737 (PM)  | CND2_MOUSE<br>Condensin complex subunit 2               | M phase of mitotic cell cycle,nuclear division,cytokinesis,cell cycle,cell growth and/or maintenance,                        |                                                                 | nucleus,                                          |
| testis | ENSMUSP00000045925 (MS)D |                                                         | macromolecule metabolism,                                                                                                    | protein binding,                                                | ubiquitin ligase complex,cyt                      |

|        |                             |                                                         |                                                                                                                                                                                                                                                                             |                                                               |                                                                                                         |
|--------|-----------------------------|---------------------------------------------------------|-----------------------------------------------------------------------------------------------------------------------------------------------------------------------------------------------------------------------------------------------------------------------------|---------------------------------------------------------------|---------------------------------------------------------------------------------------------------------|
|        |                             |                                                         |                                                                                                                                                                                                                                                                             |                                                               | oplasm,<br>nucleus,                                                                                     |
| testis | ENSMUSP000000<br>47588 (MS) |                                                         |                                                                                                                                                                                                                                                                             | protein binding,                                              |                                                                                                         |
| testis | ENSMUSP000000<br>59448 (MS) | TUR8_MOUSE<br>Tumor rejection<br>antigen P815A          |                                                                                                                                                                                                                                                                             |                                                               | nucleus,inte<br>gral to<br>membrane,                                                                    |
| testis | ENSMUSP000000<br>59630 (MS) | HSP3_MOUSE<br>Sperm protamine<br>P3                     | reproduction,M phase of<br>mitotic cell cycle,nuclear<br>division,cell<br>cycle,gametogenesis,cell<br>growth and/or<br>maintenance,sexual<br>reproduction,                                                                                                                  | nucleic acid<br>binding,                                      | nucleus,chr<br>omosome,                                                                                 |
| testis | ENSMUSP000000<br>63590 (PM) | N107_MOUSE<br>Nuclear pore<br>complex protein<br>Nup107 | cell growth and/or<br>maintenance,                                                                                                                                                                                                                                          |                                                               | nucleus,end<br>omembrane<br>system,inte<br>gral to<br>membrane,                                         |
| testis | ENSMUSP000000<br>65423 (PM) |                                                         |                                                                                                                                                                                                                                                                             | carbohydrate<br>binding,                                      |                                                                                                         |
| testis | ENSMUSP000000<br>65836 (PM) |                                                         |                                                                                                                                                                                                                                                                             |                                                               |                                                                                                         |
| testis | ENSMUSP000000<br>67770 (MS) |                                                         |                                                                                                                                                                                                                                                                             |                                                               |                                                                                                         |
| testis | ENSMUSP000000<br>77192 (PM) |                                                         | lipid<br>metabolism,phospholipid<br>metabolism,phosphatidylcho<br>line<br>biosynthesis,phospholipid<br>biosynthesis,biosynthesis,m<br>acromolecule<br>metabolism,membrane lipid<br>biosynthesis,phosphatidylch<br>oline<br>metabolism,glycerophosphol<br>ipid biosynthesis, | transferase<br>activity,                                      | cytoplasm,<br>mitochondri<br>al<br>membrane,e<br>ndomembra<br>ne<br>system,inte<br>gral to<br>membrane, |
| testis | ENSMUSP000000<br>78413-D    | FBS1_MOUSE<br>Fibrosin-1<br>[Fragment]                  |                                                                                                                                                                                                                                                                             | receptor binding,                                             |                                                                                                         |
| thymus | ENSMUSP000000<br>00028 (PM) | CC45_MOUSE<br>CDC45-related<br>protein                  | nucleobase, nucleoside,<br>nucleotide and nucleic acid<br>metabolism,cell cycle,cell<br>growth and/or maintenance,                                                                                                                                                          |                                                               | nucleus,                                                                                                |
| thymus | ENSMUSP000000<br>20765 (PM) | DPD2_MOUSE<br>DNA polymerase<br>delta subunit 2         | nucleobase, nucleoside,<br>nucleotide and nucleic acid<br>metabolism,cell cycle,cell<br>growth and/or maintenance,                                                                                                                                                          | transferase<br>activity,                                      | nucleus,                                                                                                |
| thymus | ENSMUSP000000<br>21130 (MS) |                                                         |                                                                                                                                                                                                                                                                             |                                                               |                                                                                                         |
| thymus | ENSMUSP000000<br>21164 (MS) |                                                         |                                                                                                                                                                                                                                                                             |                                                               |                                                                                                         |
| thymus | ENSMUSP000000<br>25704 (MS) |                                                         | cytokinesis,cell growth<br>and/or maintenance,                                                                                                                                                                                                                              |                                                               |                                                                                                         |
| thymus | ENSMUSP000000<br>25773 (PM) | DPD4_MOUSE<br>DNA polymerase<br>delta subunit 4         | nucleobase, nucleoside,<br>nucleotide and nucleic acid<br>metabolism,cell cycle,cell<br>growth and/or maintenance,                                                                                                                                                          | transferase<br>activity,                                      | nucleus,                                                                                                |
| thymus | ENSMUSP000000<br>27162 (MS) |                                                         | response to biotic stimulus,                                                                                                                                                                                                                                                | antigen<br>binding,receptor<br>binding,peptide<br>binding,    | plasma<br>membrane,i<br>ntegral to<br>membrane,                                                         |
| thymus | ENSMUSP000000<br>30180 (MS) |                                                         | cell activation,immune<br>response,signal<br>transduction,response to<br>biotic stimulus,T-cell<br>activation,immune cell<br>activation,lymphocyte<br>activation,regulation of T-<br>cell activation,regulation of                                                          | receptor<br>signaling protein<br>activity,protein<br>binding, | plasma<br>membrane,i<br>ntegral to<br>membrane,                                                         |

|        |                         |                                                        |                                                                                                                                                                                                                                                               |                                                                                         |                                                     |
|--------|-------------------------|--------------------------------------------------------|---------------------------------------------------------------------------------------------------------------------------------------------------------------------------------------------------------------------------------------------------------------|-----------------------------------------------------------------------------------------|-----------------------------------------------------|
|        |                         |                                                        | cell activation,                                                                                                                                                                                                                                              |                                                                                         |                                                     |
| thymus | ENSMUSP00000030705 (PM) | RFA2_MOUSE<br>Replication protein A 32 kDa subunit     | nucleobase, nucleoside, nucleotide and nucleic acid metabolism, cell cycle, cell growth and/or maintenance,                                                                                                                                                   | nucleic acid binding,                                                                   | nucleus,                                            |
| thymus | ENSMUSP00000034539 (PM) |                                                        | nucleobase, nucleoside, nucleotide and nucleic acid metabolism, catabolism, macromolecule catabolism, macromolecule metabolism,                                                                                                                               | hydrolase activity,                                                                     | nucleus,                                            |
| thymus | ENSMUSP00000038204 (MS) | RAG2_MOUSE<br>V(D)J recombination-activating protein 2 | cell activation, nucleobase, nucleoside, nucleotide and nucleic acid metabolism, immune response, response to biotic stimulus, morphogenesis, organogenesis, lymphocyte differentiation, cell differentiation, immune cell activation, lymphocyte activation, | nucleic acid binding, peroxidase activity, oxidoreductase activity, hydrolase activity, | nucleus,                                            |
| thymus | ENSMUSP00000044493 (MS) |                                                        |                                                                                                                                                                                                                                                               |                                                                                         |                                                     |
| thymus | ENSMUSP00000045737 (PM) | CND2_MOUSE<br>Condensin complex subunit 2              | M phase of mitotic cell cycle, nuclear division, cytokinesis, cell cycle, cell growth and/or maintenance,                                                                                                                                                     |                                                                                         | nucleus,                                            |
| thymus | ENSMUSP00000047720 (PM) |                                                        |                                                                                                                                                                                                                                                               |                                                                                         |                                                     |
| thymus | ENSMUSP00000063590 (PM) | N107_MOUSE<br>Nuclear pore complex protein Nup107      | cell growth and/or maintenance,                                                                                                                                                                                                                               |                                                                                         | nucleus, endomembrane system, integral to membrane, |

\*PM – pre-metazoan protein; MS – metazoan-specific protein

**Supplementary Table 3.** Tissue list of the main dataset. Cluster representatives are indicated using bold face.

| Tissue              | Cluster ID |
|---------------------|------------|
| <b>Antrum</b>       | 1          |
| <b>Appendix</b>     | 2          |
| Bladder             | 3          |
| Gall bladder        | 3          |
| <b>Lung</b>         | 3          |
| <b>Brain</b>        | 4          |
| Eye                 | 4          |
| Cecum               | 5          |
| <b>Duodenum</b>     | 5          |
| Ileum               | 5          |
| Jejunum             | 5          |
| <b>Distal colon</b> | 6          |
| Proximal colon      | 6          |
| <b>Heart</b>        | 7          |
| <b>Kidney</b>       | 8          |
| <b>Liver</b>        | 9          |
| <b>Muscle</b>       | 10         |
| Spleen              | 11         |
| <b>Thymus</b>       | 11         |
| <b>Testis</b>       | 12         |
| Testis              | 12         |
| <b>Vas deferens</b> | 13         |

**Supplementary Table 4.** Tissue list of the additional dataset. Cluster representatives are indicated using bold face.

| Tissue                            | Cluster ID |
|-----------------------------------|------------|
| Amygdala                          | 1          |
| <b>Cerebellum</b>                 | 1          |
| Cerebral cortex                   | 1          |
| Dorsal root ganglion              | 1          |
| Dorsal striatum                   | 1          |
| Frontal cortex                    | 1          |
| Hippocampus                       | 1          |
| Hypothalamus                      | 1          |
| Olfactory bulb                    | 1          |
| Preoptic                          | 1          |
| Retina                            | 1          |
| Lower spinal cord                 | 1          |
| Upper spinal cord                 | 1          |
| Substantianigra                   | 1          |
| Trigeminal                        | 1          |
| b220.bcell                        | 2          |
| cd4.Tcell                         | 2          |
| cd8.Tcell                         | 2          |
| Lymph node                        | 2          |
| <b>Thymus</b>                     | 2          |
| <b>Heart</b>                      | 3          |
| <b>Testis</b>                     | 4          |
| Adipose tissue                    | 5          |
| Adrenal gland                     | 5          |
| Bladder                           | 5          |
| <b>Lung</b>                       | 5          |
| Prostate                          | 5          |
| <b>Kidney</b>                     | 6          |
| <b>Liver</b>                      | 7          |
| <b>Salivary gland</b>             | 8          |
| Digits                            | 9          |
| <b>Epidermis</b>                  | 9          |
| Snout epidermis                   | 9          |
| Tongue epidermis                  | 9          |
| <b>Bone</b>                       | 10         |
| <b>Large intestine</b>            | 11         |
| Small intestine                   | 11         |
| <b>Spleen</b>                     | 12         |
| <b>Pituitary</b>                  | 13         |
| Medial olfactory epithelium (MOE) | 14         |
| <b>Vomerol-nasal organ (VMO)</b>  | 14         |
| <b>Thyroid</b>                    | 15         |
| <b>Stomach</b>                    | 16         |
| <b>Pancreas</b>                   | 17         |

|                        |    |
|------------------------|----|
| <b>Brown fat</b>       | 18 |
| <b>Skeletal muscle</b> | 19 |
| <b>Bone marrow</b>     | 20 |
